# Supplementary material for: Methane conversion coupled with hydrogen production from water using Au/Ga2O3 photocatalysts prepared by different methods
Source: Royal Society of Chemistry journal article supplement (doi:10.1039/d3se00629h), 2023-01-01
Supplement: d3se00629h1.pdf [file d3se00629h1.pdf]

Supplementary material

## Methane conversion coupling with hydrogen production from water using Au/Ga<sub>2</sub>O<sub>3</sub> photocatalysts prepared by different methods

Eliane R. Januario<sup>a\*</sup>, Saulo A. Carminati<sup>a</sup>, Aryane Tofanello<sup>b</sup>, Bruno L. da Silva<sup>c</sup>, Patricia F. Silvaino<sup>a</sup>, Arthur P. Machado<sup>a</sup>, Jorge M. Vaz<sup>a</sup>, and Estevam V. Spinacé<sup>a</sup>.

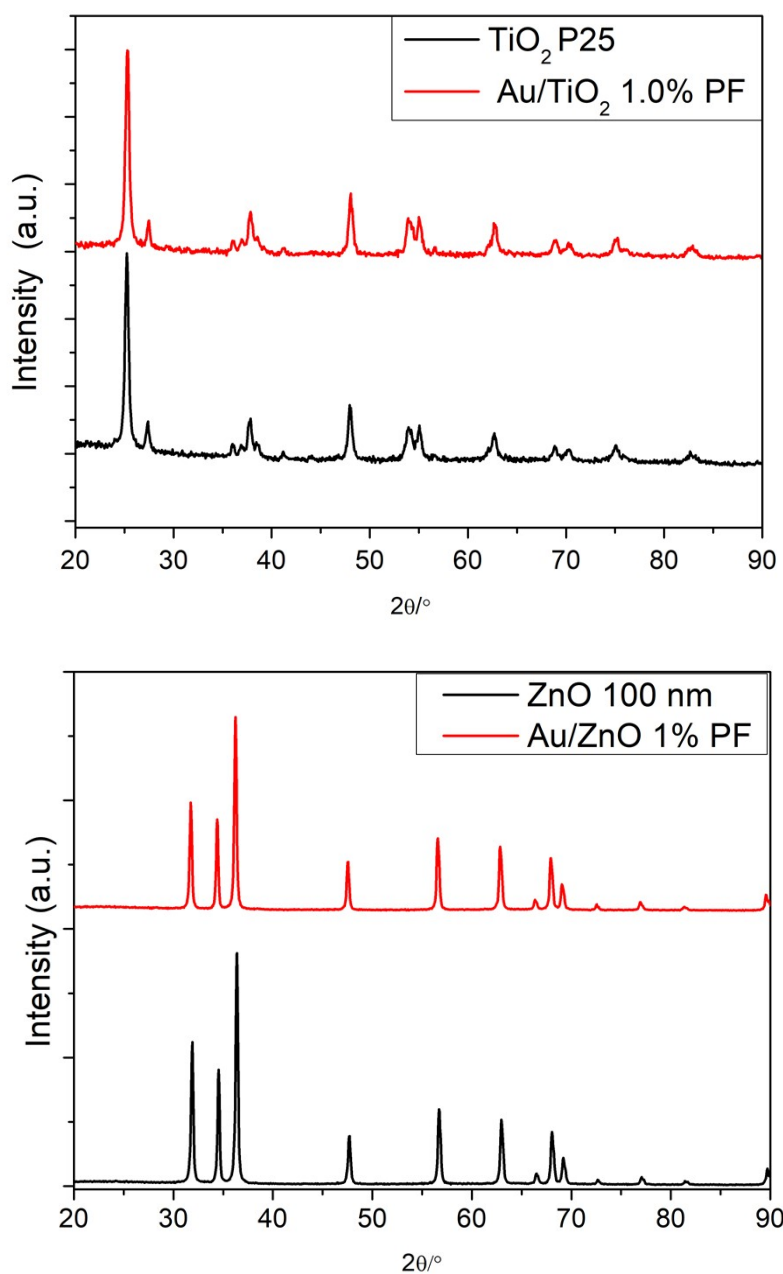

**Figure S1-** X-ray diffractograms of Au/TiO<sub>2</sub> 1.0% wt, and Au/ZnO 1.0% wt (red lines) and their respective supports (black lines).

a)

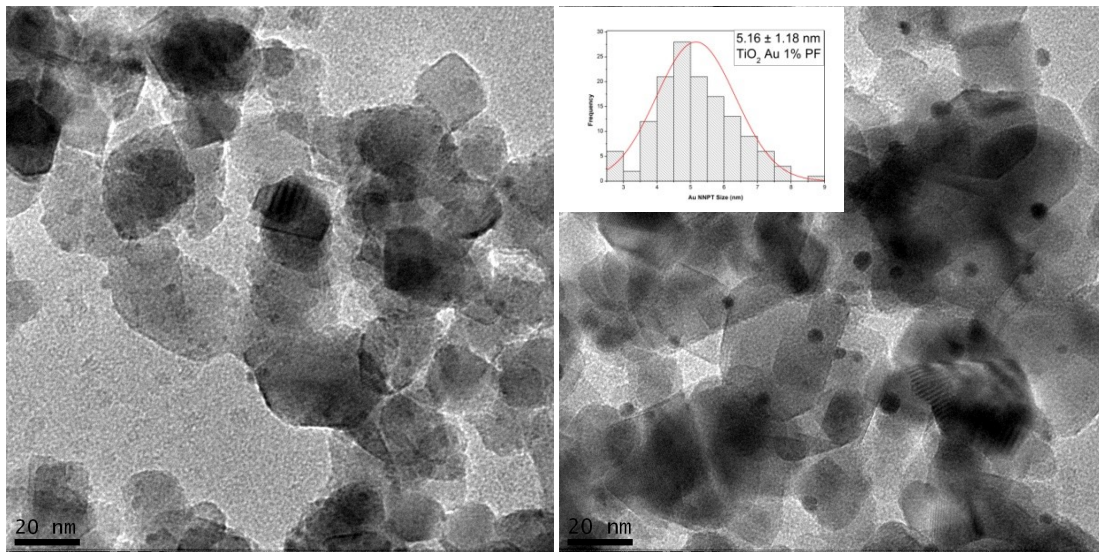

b)

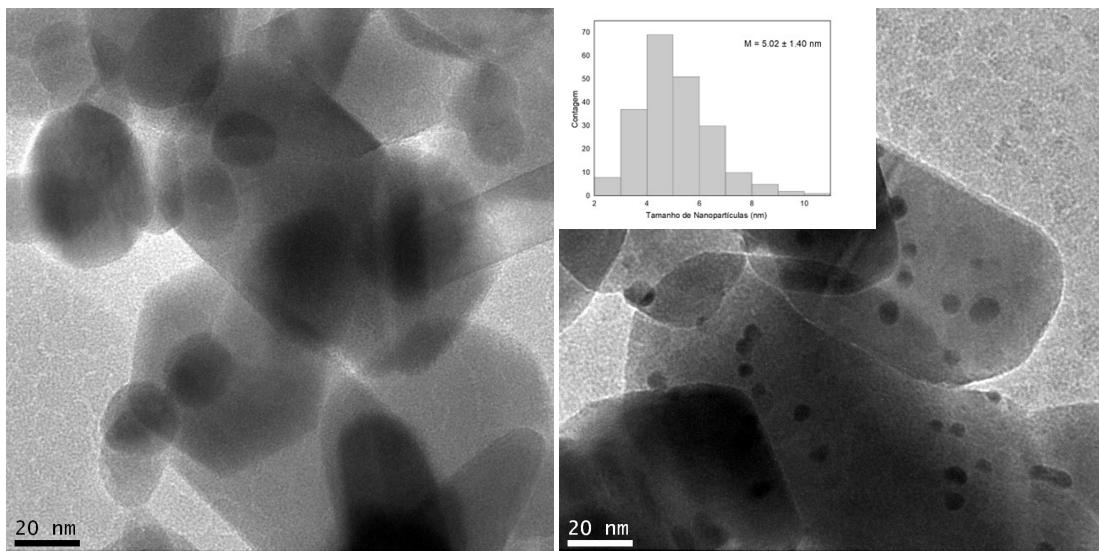

**Figure S2** – Transmission electron micrographics of a) TiO<sub>2</sub> P25 and b) TiO<sub>2</sub> Au 1.0% wt pre-formed.

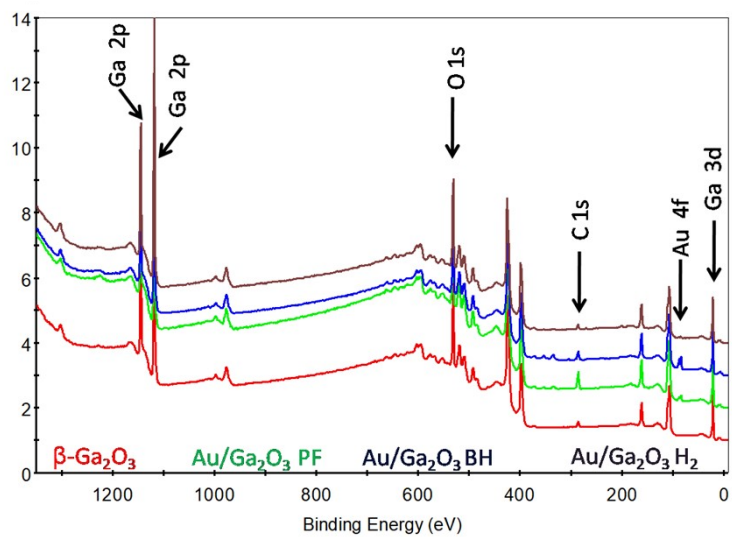

**Figure S3-** XPS survey spectra of  $\beta\text{-Ga}_2\text{O}_3$  and  $\text{Au/Ga}_2\text{O}_3$  1.0% wt photocatalysts synthesized by PF, BH and  $\text{H}_2$  methods.

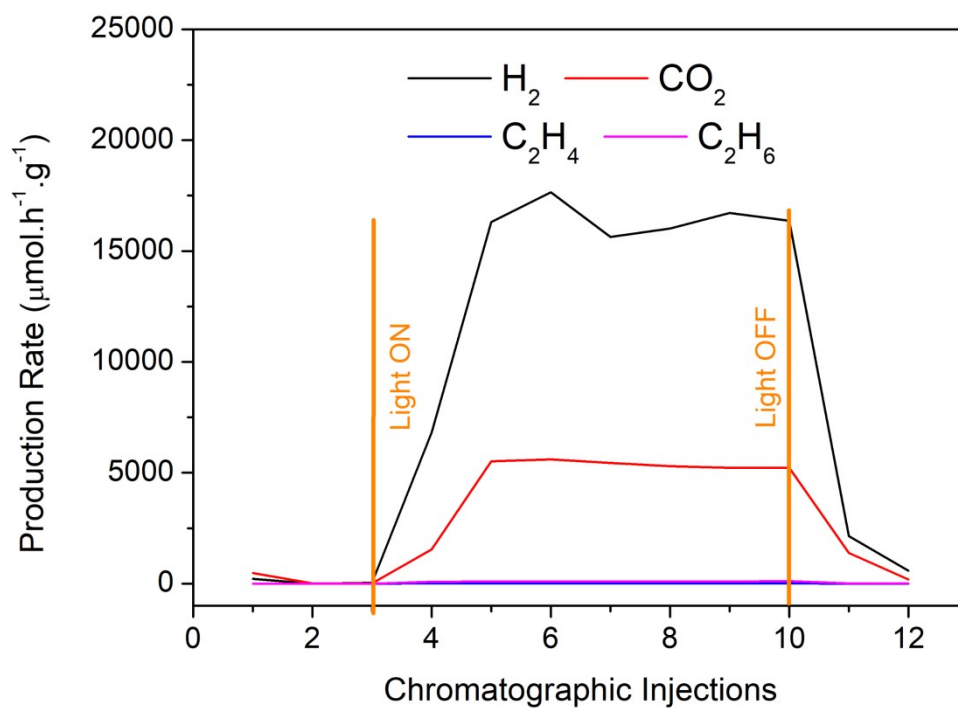

**Figure S4** – Products formation profile for Au/ $\text{Ga}_2\text{O}_3$  BH 0.1% photocatalyst.

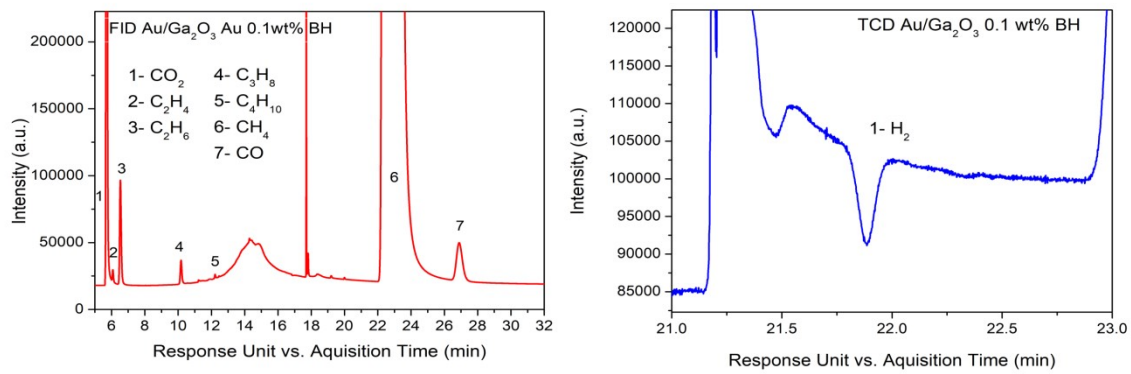

**Figure S5** – Chromatograms of products obtained by Au/Ga<sub>2</sub>O<sub>3</sub> 0.1%wt BH photocatalyst.
